# Supplementary material
Source: Springer Nature journal article supplement (https://www.springermedizin.de/resource/supplementary/12985_2010_861_MOESM1_ESM.pdf/9608610)

M

1

2

3

4

7500 bp →

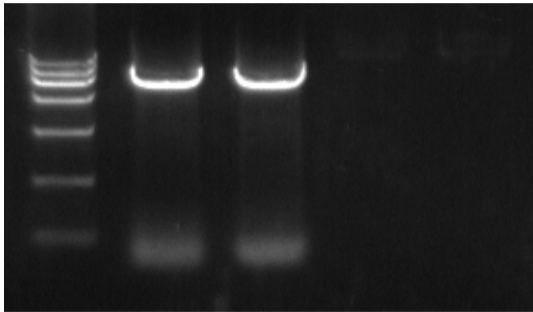

Supplement: MOESM1 [file 9608610]
